# Supplementary material
Source: JCI journal article supplement (doi:10.1172/jci187942)

Figure 1D

dm1a

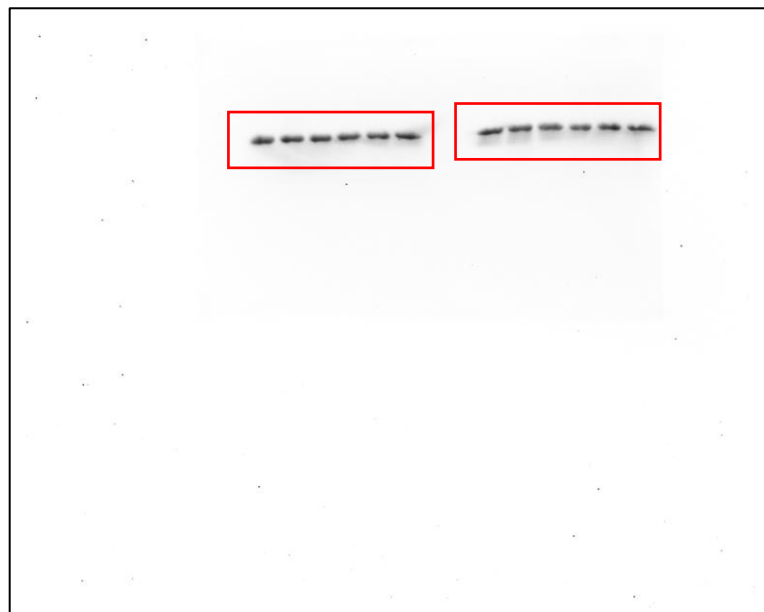

WT

G219S

Tyr  $\alpha$ -tub

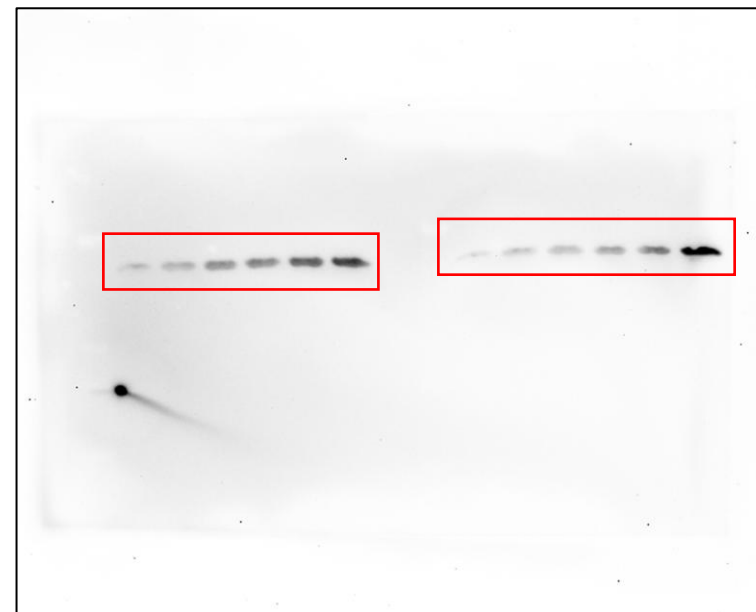

WT

G219S

Figure 3C

SERCA2

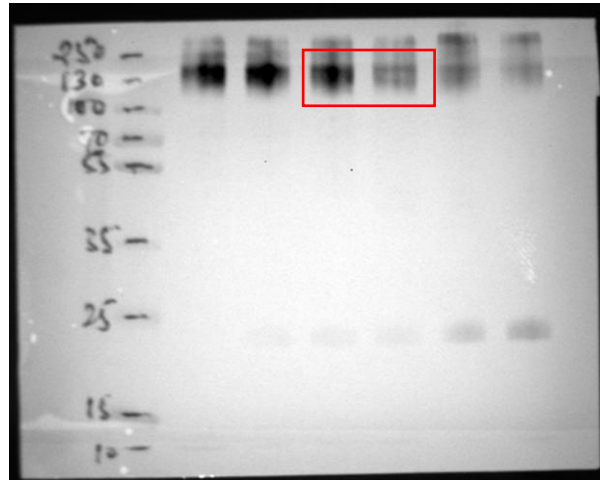

pPLN

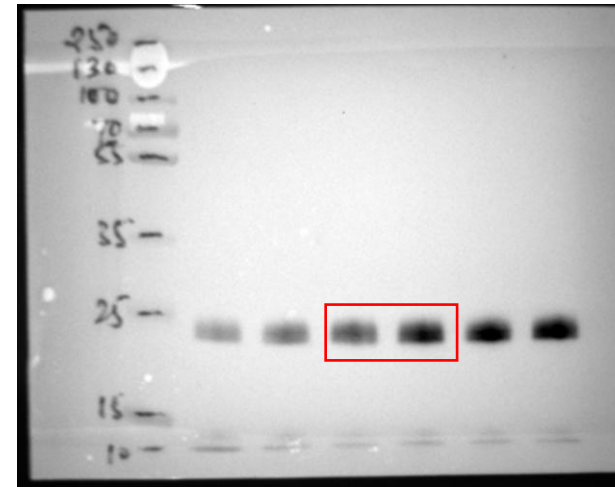

PLN

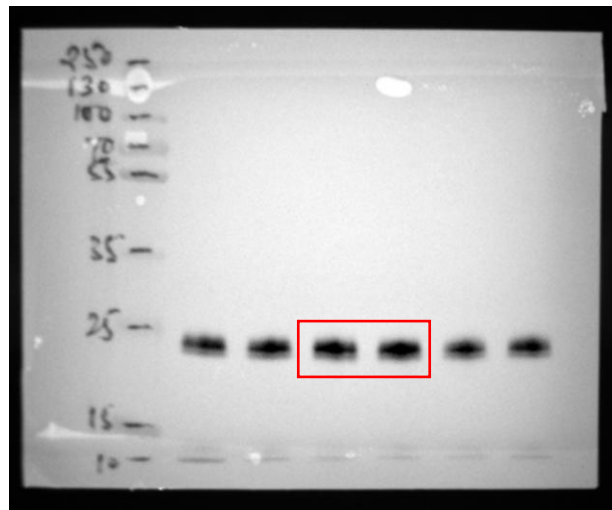

GAPDH

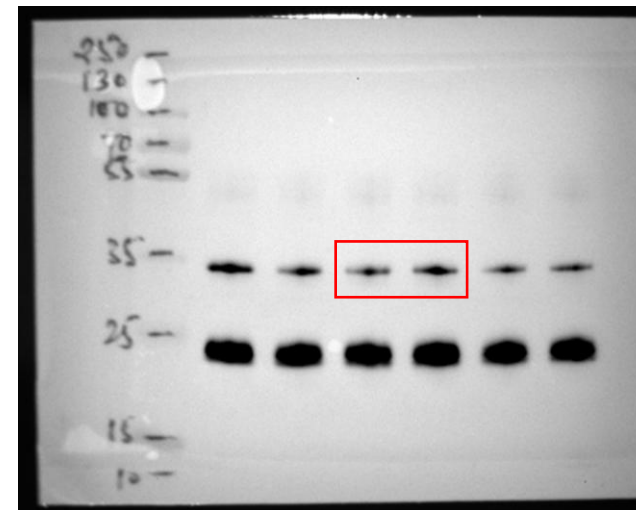

Figure 4C

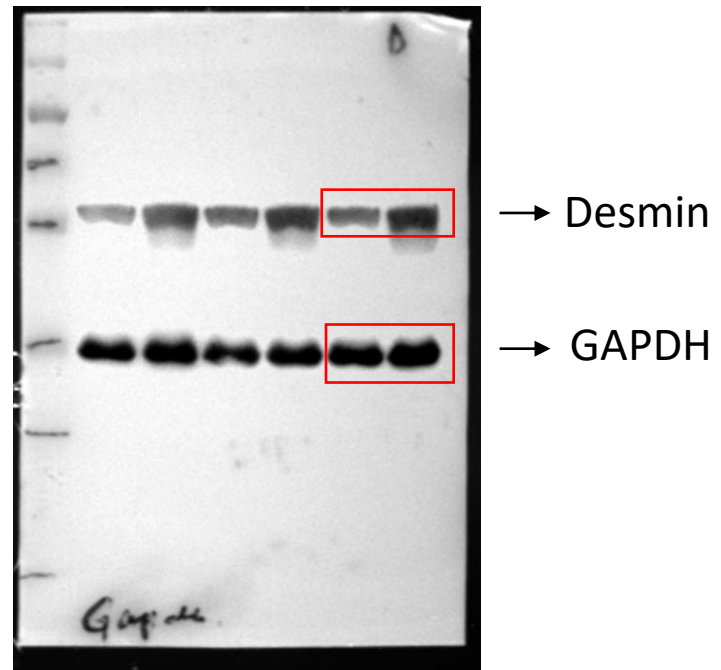

Figure 4D

Detyr.  $\alpha$ -tub

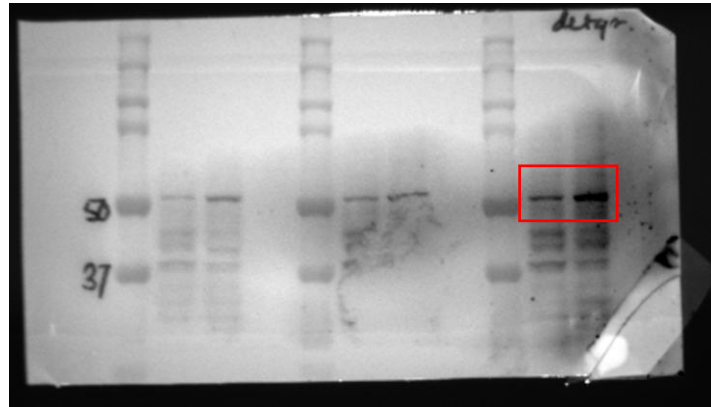

Tyr.  $\alpha$ -tub

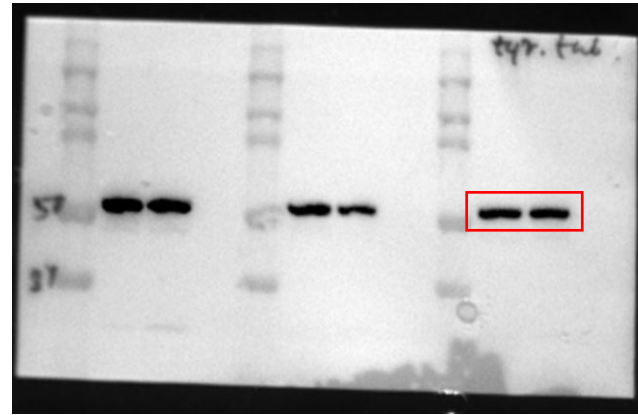

$\alpha$ -tub

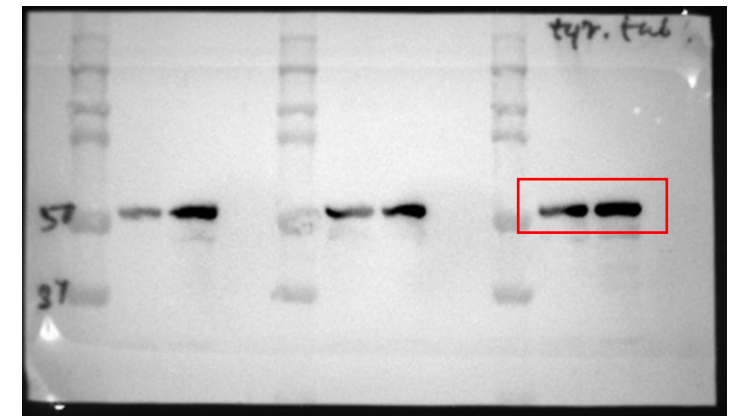

pERK1/2

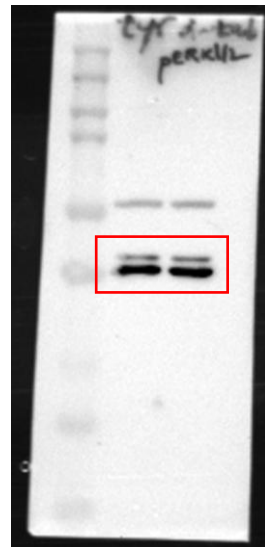

tERK1/2

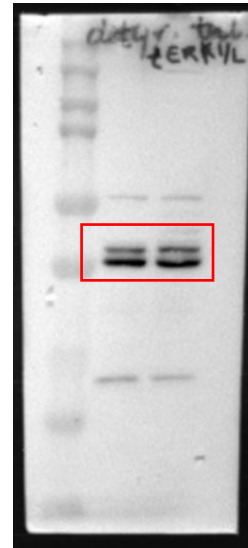

GAPDH

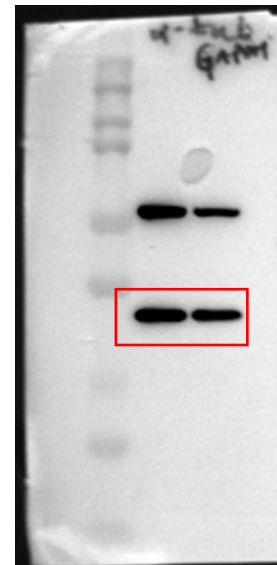

Figure 5D

Detyr.  $\alpha$ -tub

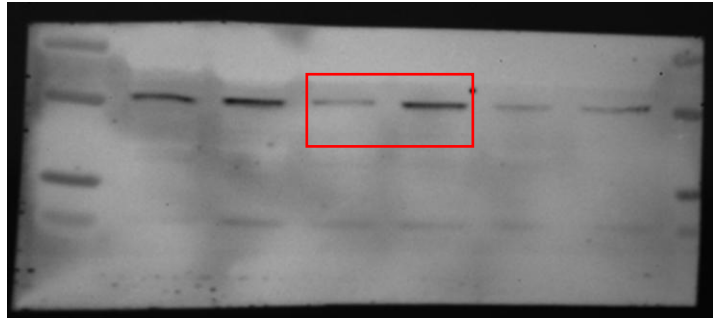

$\alpha$ -tub

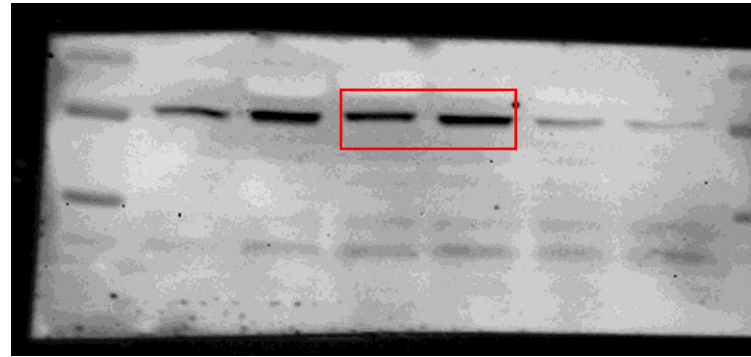

GAPDH

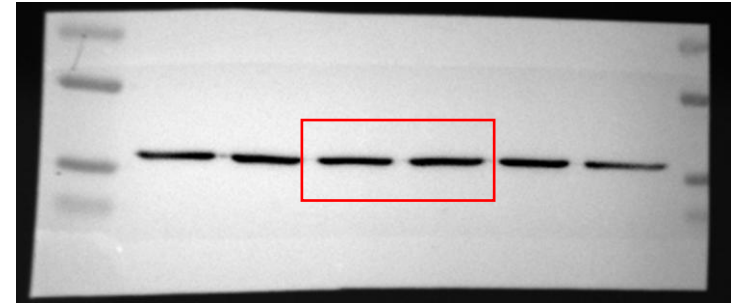

Figure 6E

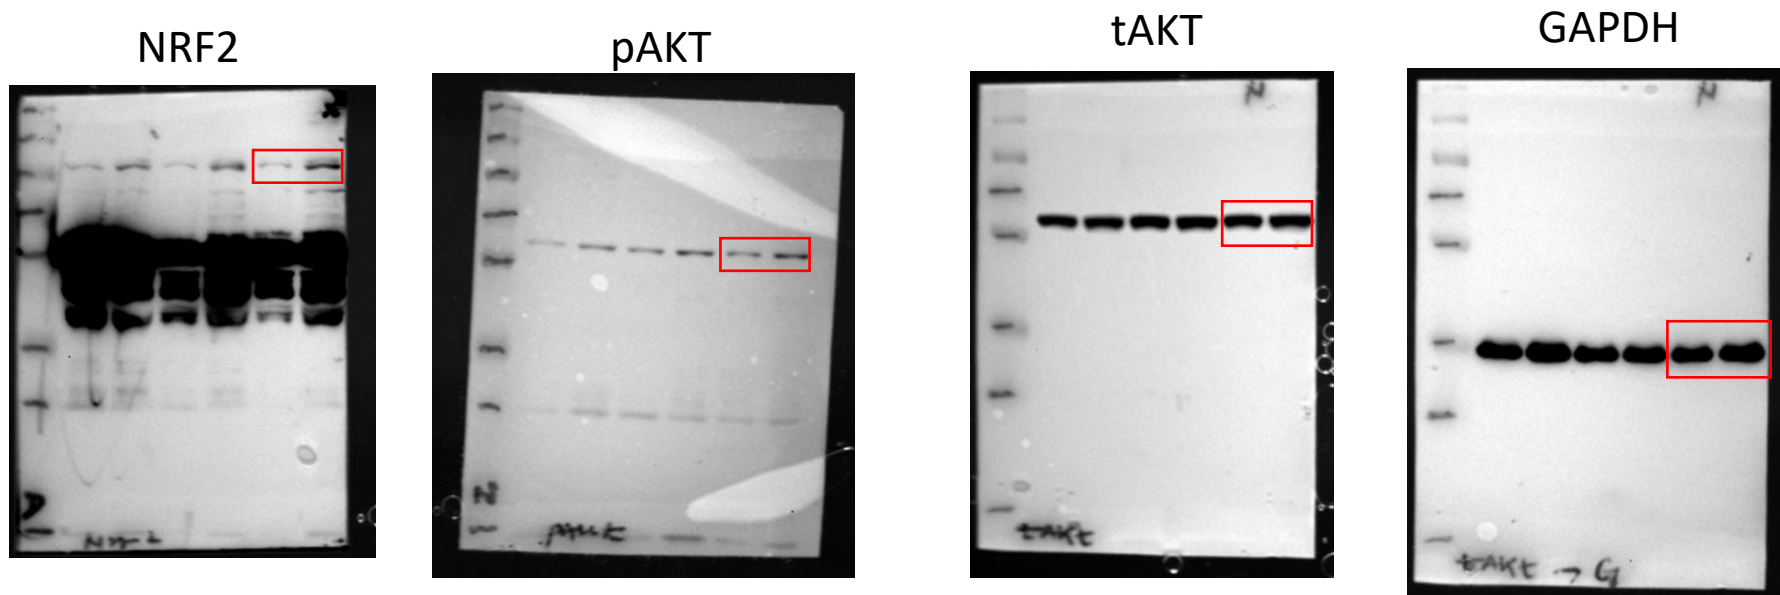

Figure 6H

NRF2

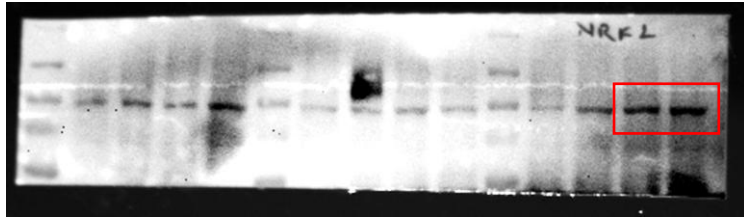

GCLC

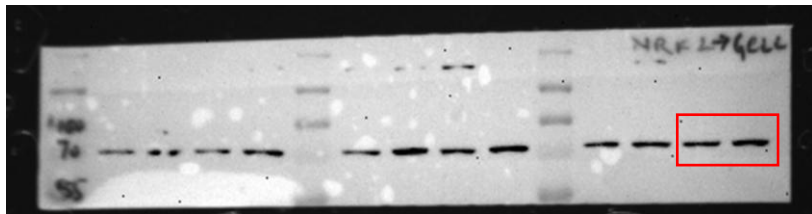

GAPDH

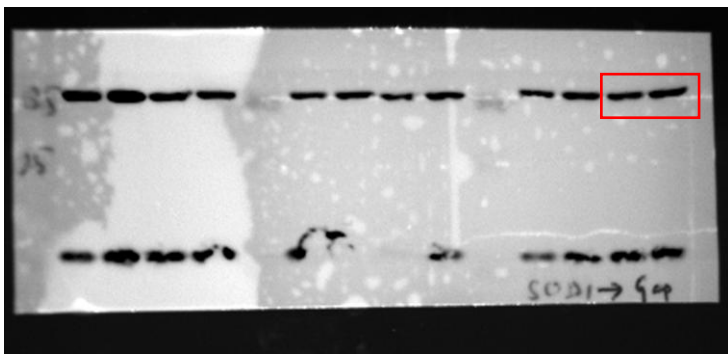

SOD1

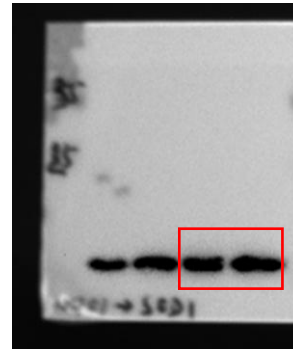

NQO1 membrane

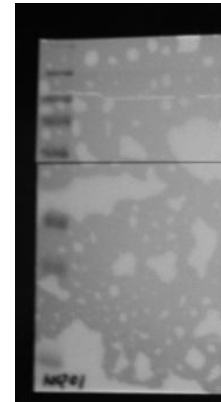

NQO1 chemi

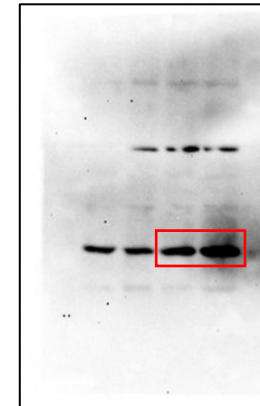

Figure 7C

Detyr.  $\alpha$ -tub

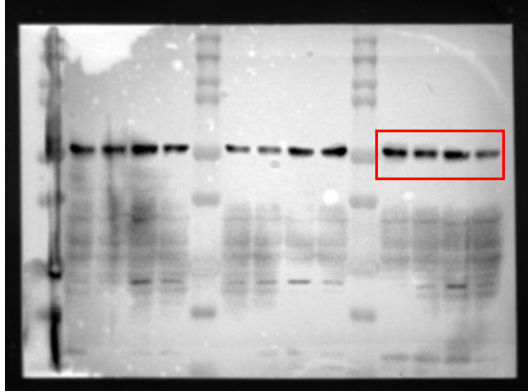

$\alpha$ -tub

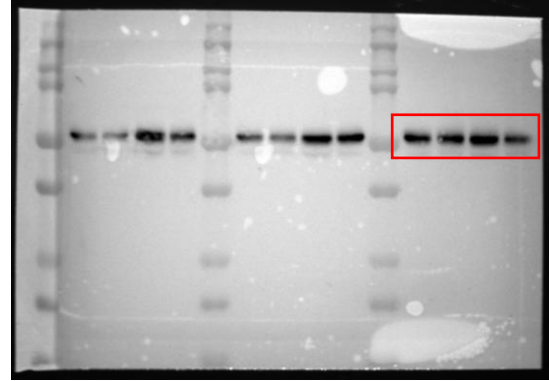

Desmin

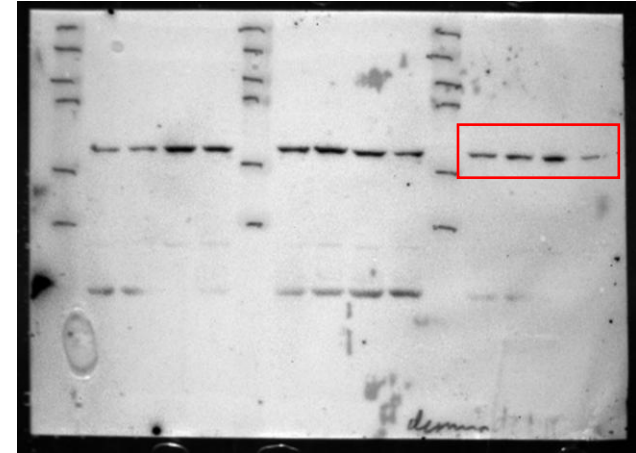

pERK1/2

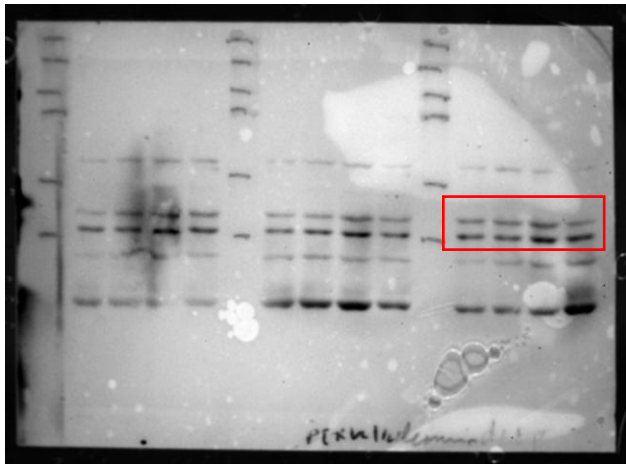

GAPDH

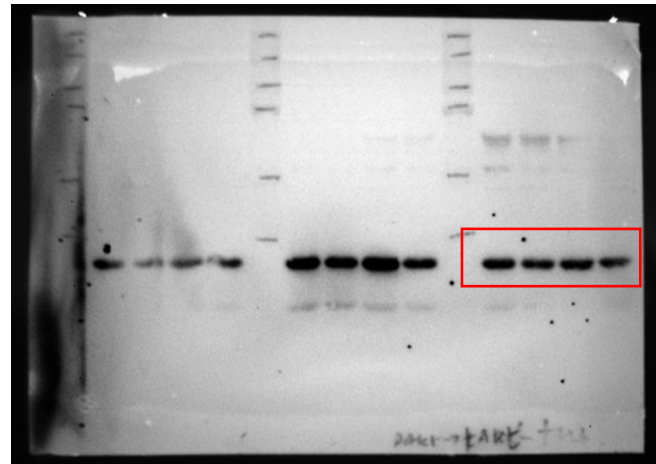

tERK1/2

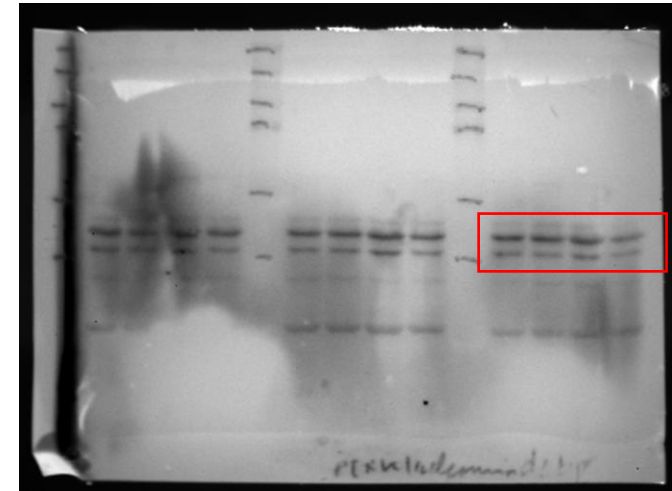

Figure 8B

NRF2

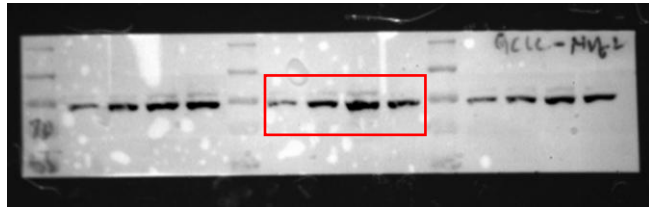

SOD1

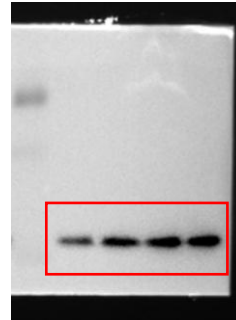

GAPDH

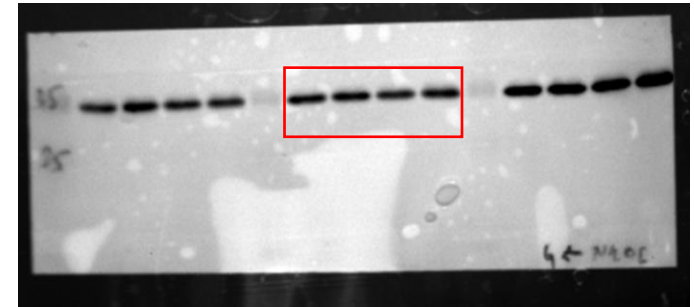

NQO1

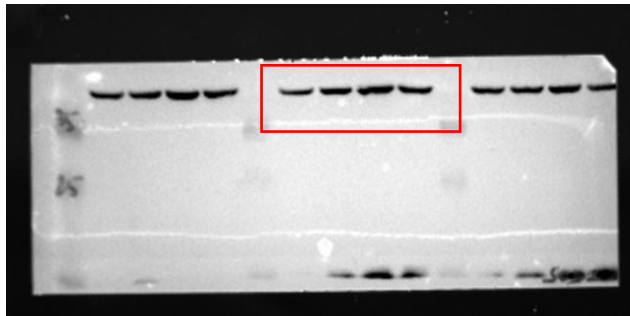

GCLC

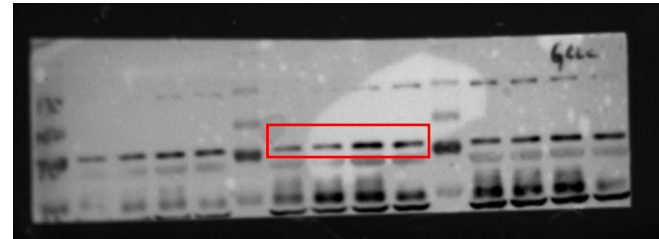

Supplement: sd2 [file 2]
